# Supplementary material
Source: PubMed Central journal article supplement (PMC3549884)
Supplement: epi-8-92-s01.pdf [file epi-8-92-s01.pdf]

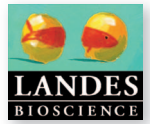

## **Supplemental Material to:**

**Jumpei Yamazaki, Marcos R. Estecio, Yue Lu, Hai Long,  
Gabriel G. Malouf, David Graber, Yujia Huo, Louis Ramagli,  
Shoudan Liang, Steven M. Kornblau, Jaroslav Jelinek and  
Jean-Pierre J. Issa**

**The epigenome of AML stem and progenitor cells**

**Epigenetics 2013; 8(1)**

**<http://dx.doi.org/10.4161/epi.23243>**

**<http://www.landesbioscience.com/journals/epigenetics/article/23243>**

Supplemental Figure 1

Confirmation of library preparation with small numbers of cells for ChIP-seq. qPCR was performed for GAPDH and RARB for their enrichment of K4 and K27 before (Pre) and after (Post) library preparation. Representative result from P10 is shown.

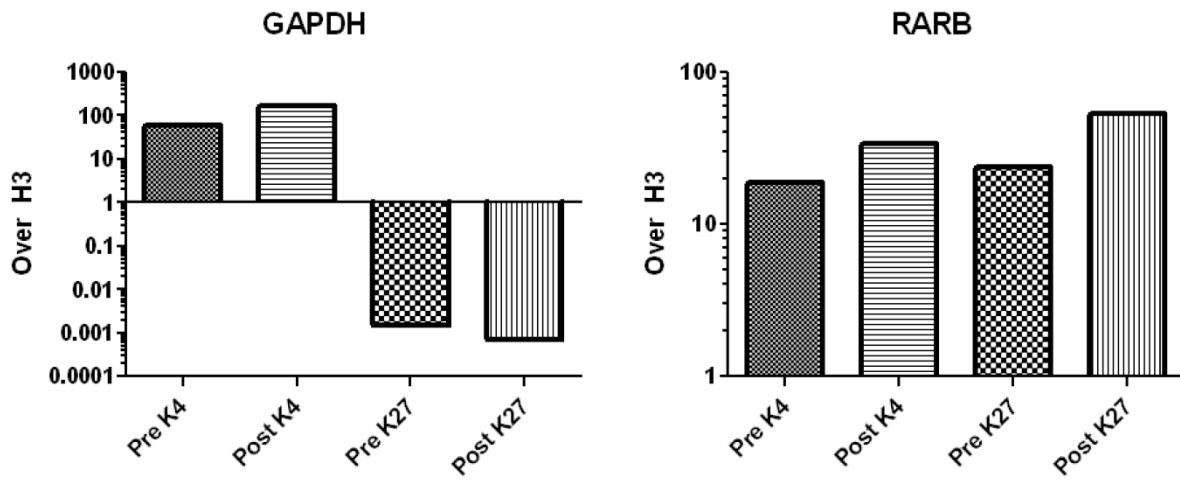

## Supplemental Figure 2

The number of peaks for K4/K27 marks according to their locations. Note that peaks generated from these tags revealed that K4 is concentrated at promoter regions whereas K27 is broadly distributed from transcription start sites to transcription end sites covering the entire genes.

| # of RefSeq Genes with H3K4me3/H3K27me3 Enrichment at Specific Locations across the Genome |           |          |          |      |        |      |            |
|--------------------------------------------------------------------------------------------|-----------|----------|----------|------|--------|------|------------|
| # of RefSeq Genes                                                                          | Peak type | Upstream | Promoter | Exon | Intron | TES  | Downstream |
| P7-9 stem                                                                                  | H3K4me3   | 2204     | 20546    | 1610 | 3048   | 1465 | 2843       |
| P7-9 progenitor                                                                            |           | 1560     | 20312    | 1073 | 1399   | 1652 | 2480       |
| P10 stem                                                                                   |           | 1555     | 14891    | 1128 | 3056   | 1033 | 1967       |
| P10 progenitor                                                                             |           | 1482     | 12562    | 1270 | 3979   | 856  | 1690       |
| P11 stem                                                                                   |           | 2548     | 22770    | 2586 | 4703   | 2629 | 3497       |
| P11 progenitor                                                                             |           | 2633     | 20913    | 2235 | 4692   | 1731 | 3281       |
| P7-9 stem                                                                                  | H3K27me3  | 636      | 7341     | 1584 | 1119   | 2146 | 783        |
| P7-9 progenitor                                                                            |           | 956      | 8730     | 2109 | 1499   | 2760 | 1133       |
| P10 stem                                                                                   |           | 1013     | 6050     | 2419 | 2132   | 2127 | 1081       |
| P10 progenitor                                                                             |           | 939      | 5294     | 2117 | 1895   | 1894 | 848        |
| P11 stem                                                                                   |           | 742      | 4061     | 1497 | 1432   | 1434 | 563        |
| P11 progenitor                                                                             |           | 797      | 6071     | 1532 | 1297   | 1806 | 781        |

### RefSeq Genes with H3K4me3 Enrichment

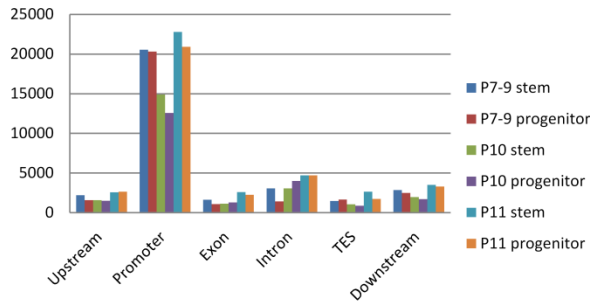

### RefSeq Genes with H3K27me3 Enrichment

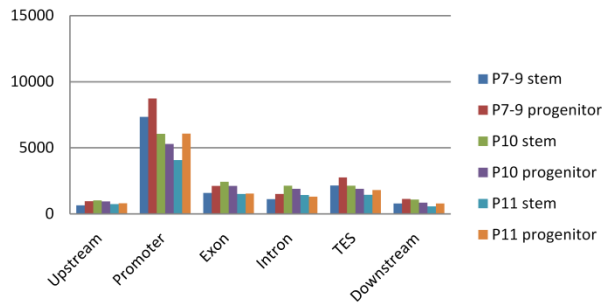

Supplemental Figure 3

Histone mark enrichment by gene expression patterns in P7-9 (A) and P11 (D). Gene expression patterns were divided into high (top 2000 genes), intermediate (medium 2000 genes), and low (bottom 2000 genes). Categories of promoter histone marks (K4 only, K27 only, bivalent and none) and associated gene expression levels in P7-9 (B) and P11 (E). (C) Numbers of the genes with respective histone status in P7-9 (C) and P11 (F). Gene expression data was taken from GEO data set GSE24006.

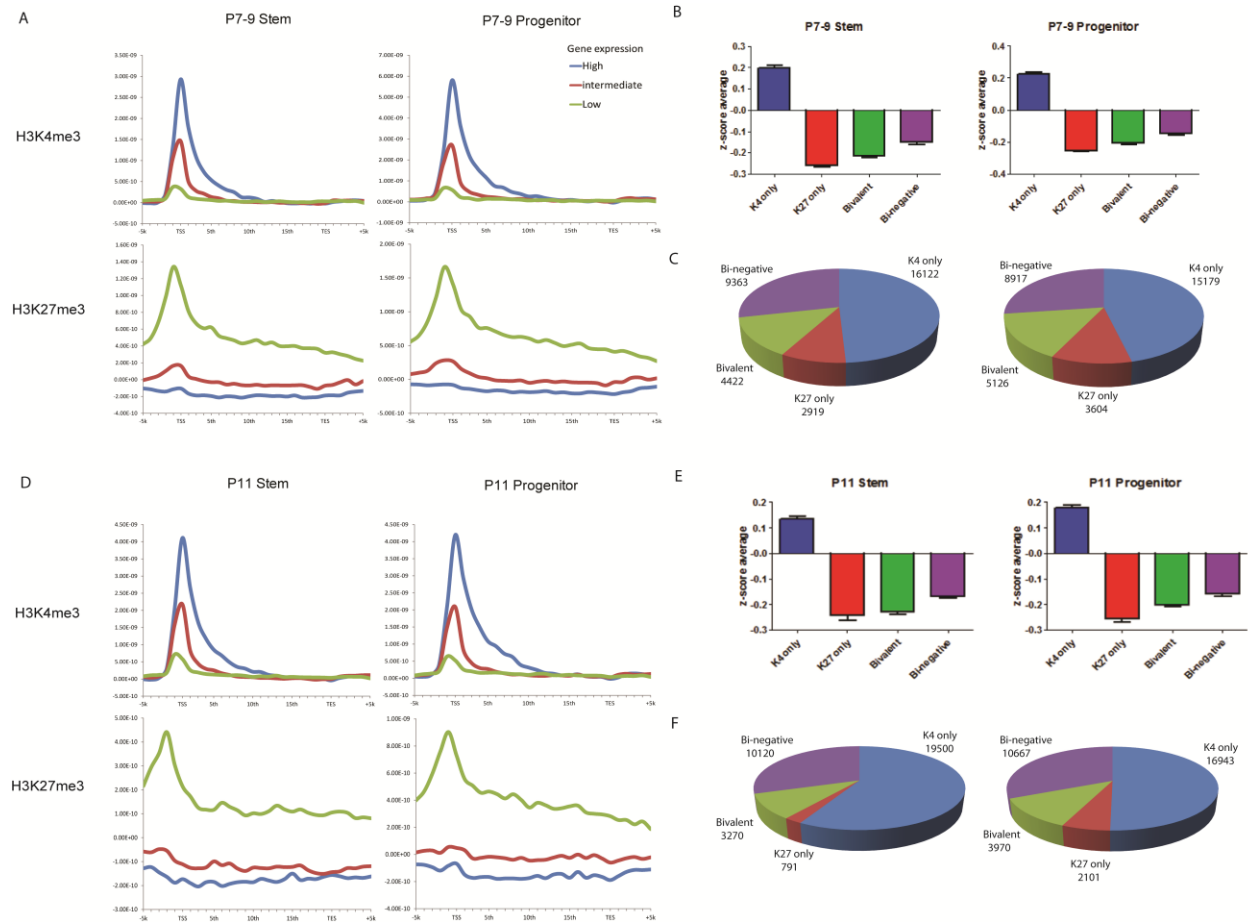

## Supplemental Figure 4

Pathway analyses from the gene enriched with either K4 or K27 in stem (Left) and progenitor (Right) in P10 (A), P7-9 (B), and P11 (C). Ingenuity pathway analysis was performed with the exclusively enriched genes in stem or progenitor cells. Bars show p-values in  $-\log(p\text{-value})$  for each pathway. Rectangles on each bar show ratio calculated by the number of molecules in a given pathway divided by total number of molecules that make up that pathway. Pathways are listed in order of rank from the most associated pathway.

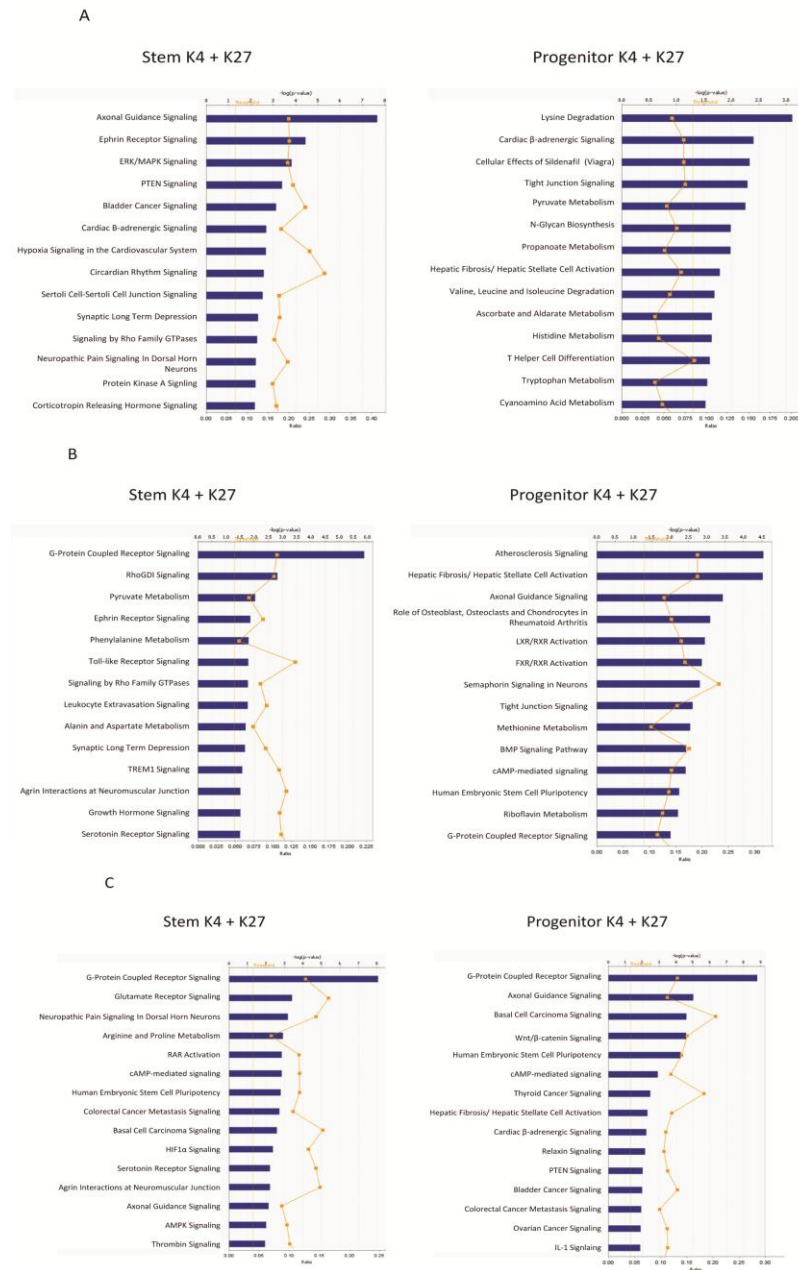

## Supplemental Figure 5

Pathway analysis for genes enriched in K4 or K27 in P7-9 (A and B) and P11 (C and D). The Venn diagrams show overlap in genes marked by K4 or K27 in their promoters. Ingenuity pathway analysis was performed with the exclusively enriched genes in stem or progenitor cells. Bars show p-values in  $-\log(p\text{-value})$  for each pathway. Rectangles on each bar show ratio calculated by the number of molecules in a given pathway divided by total number of molecules that make up that pathway. Pathways are listed in order of rank from the most associated pathway.

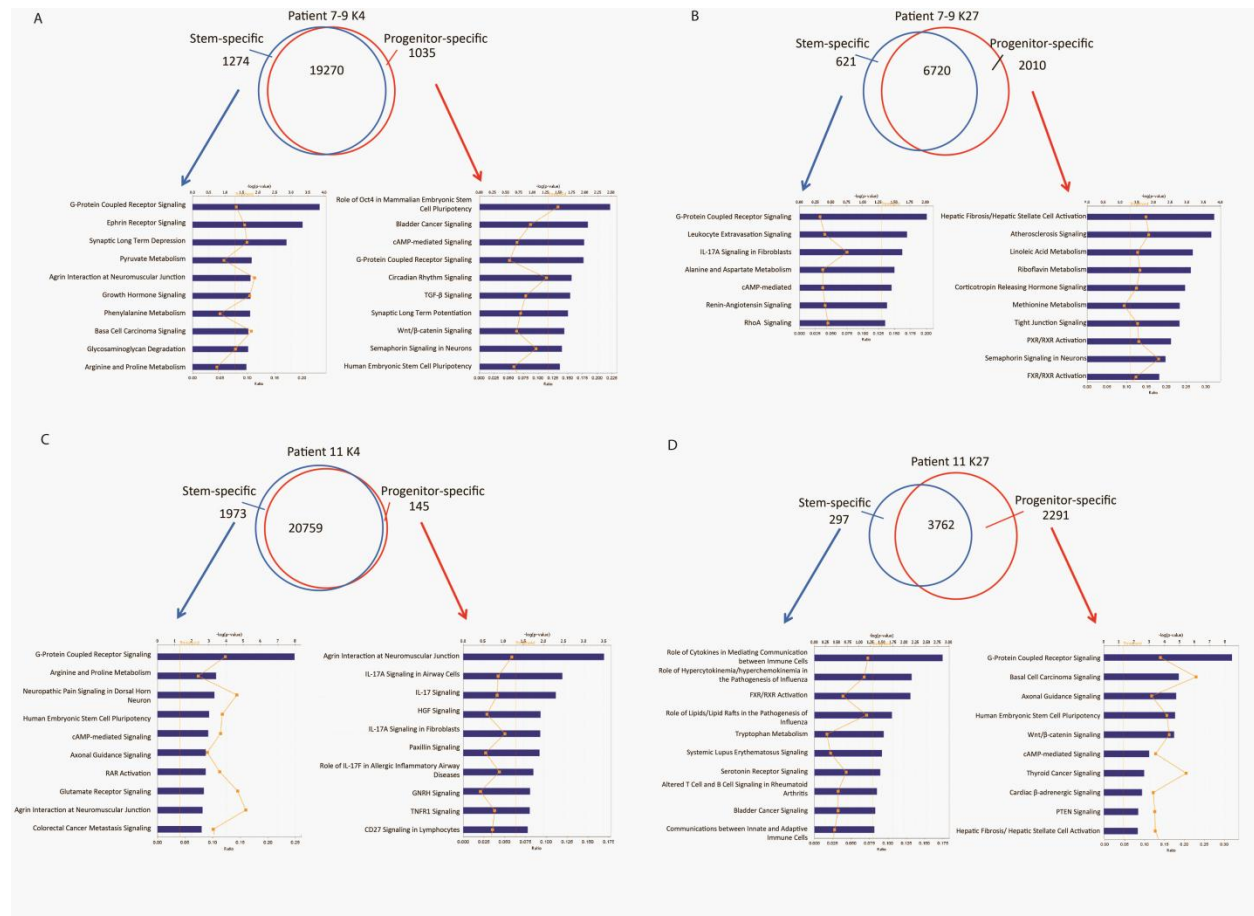

Supplemental Figure 6

Differentially marked genes with K4/K27 in stem or progenitor cells common in P10, P11, and P7-9.

Refseq numbers and gene names are shown in each corner.

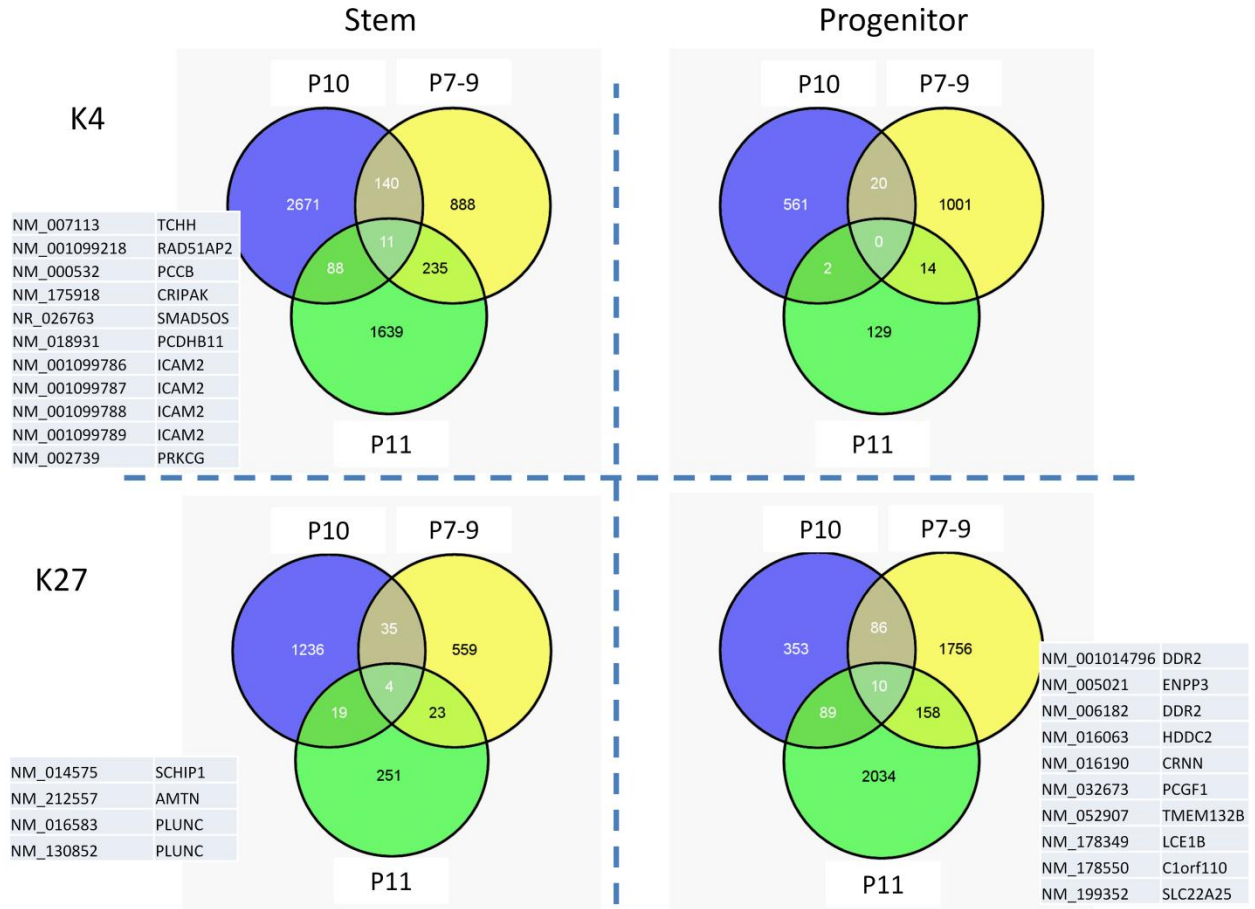

Supplemental Figure 7

(A) Unsupervised hierarchical analysis for K4/K27 marks with samples analyzed in CHIP-seq. Note that the stem and progenitor profiles clustered intra-patient rather than by cell subtype. (B) Representative correlations in gene expression between different patients of the same cell type (Left; Stem 1 vs Stem2 and Progenitor 1 versus Progenitor 2) and correlation between stem and progenitor in the same patient (Right; Stem 1 versus Progenitor 1). These analyses were done in two separate gene expression datasets (GE Dataset 1 and 2; GEO Accession No. GSE24006 and 34044, respectively)

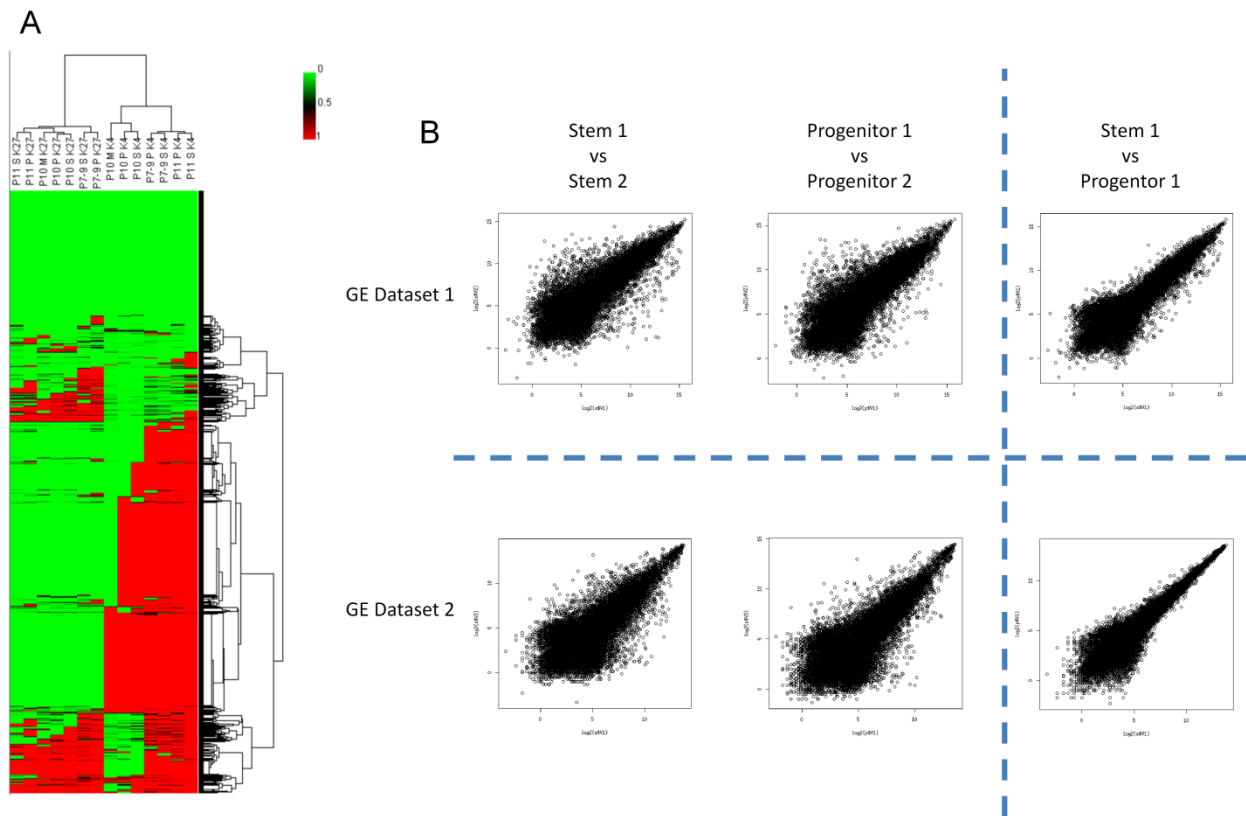



## Supplemental Figure 8

Histone switches in AML stem versus progenitor cells. (A and D) Number of genes in each histone category in stem and progenitor AML cells. Arrows point to the histone status in progenitor cells by baseline histone status in stem cells in P7-9 (A) and P11 (D). (B and E) Graphical representation of data shown in (B and E). (C and F) Pathway analysis for the genes that are bivalent in stem cells and switch to K4 only or K27 only in progenitor cells in P7-9 (C) and P11 (F).

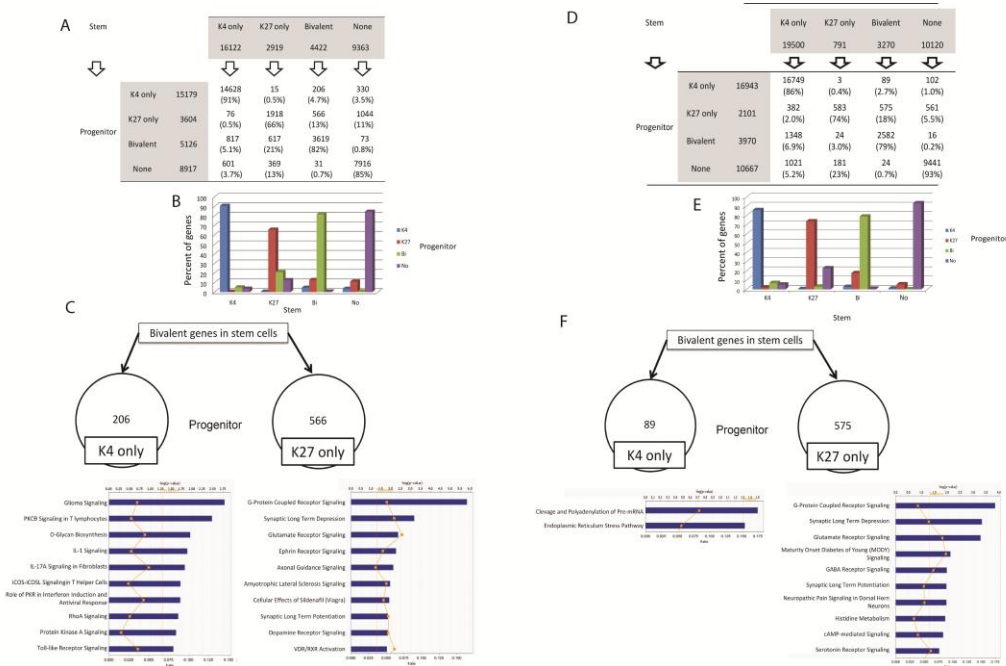

Supplemental Figure 9

Pathway analysis from the gene enriched with K4 (Upper) or K27 (Lower) marks in P10. The numbers of the genes enriched only in stem cells (red), in progenitor cells (blue), and in mature cells (green).

Pathway analyses were performed with the exclusively enriched genes each population.

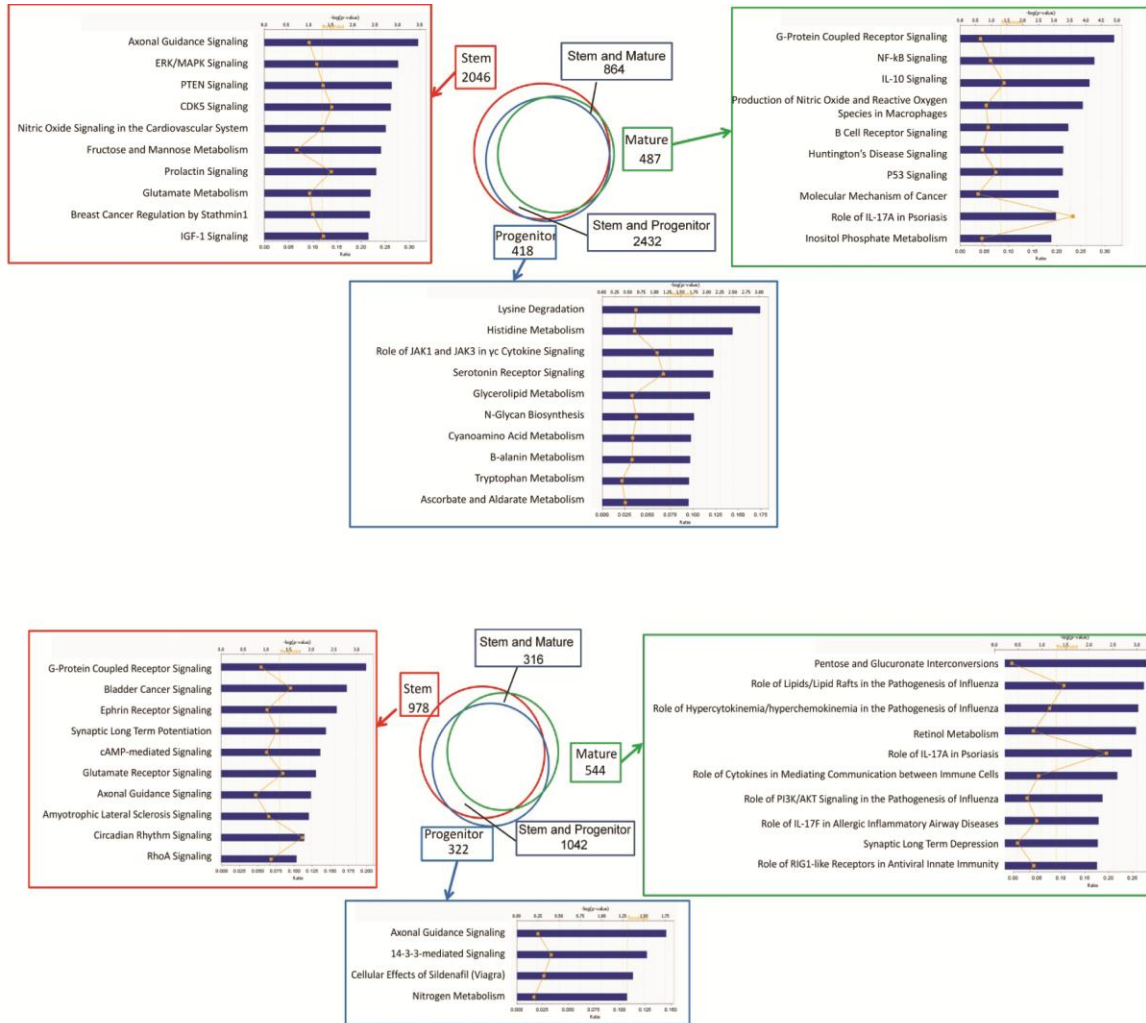

Supplemental Table 1. Patient samples studied.

| Patient    | Stem<br>(CD34+CD38-) | Progenitor<br>(CD34+CD38+) | Mature<br>(CD34-) | Source | Blasts |
|------------|----------------------|----------------------------|-------------------|--------|--------|
| Patient 1  | MCAM&Pyro            | MCAM&Pyro                  | Pyro              | PB     | 91%    |
| Patient 2  | MCAM&Pyro            | MCAM&Pyro                  | N/A               | PB     | 70%    |
| Patient 3  | MCAM&Pyro            | MCAM&Pyro                  | N/A               | PB     | 72%    |
| Patient 4  | MCAM&Pyro            | MCAM&Pyro                  | Pyro              | PB     | 85%    |
| Patient 5  | Pyro                 | Pyro                       | Pyro              | BM     | 94%    |
| Patient 6  | Pyro                 | Pyro                       | Pyro              | PB     | 91%    |
| Patient 7  | ChIP-seq             | ChIP-seq                   | N/A               | BM     | 53%    |
| Patient 8  |                      |                            |                   | BM     | 95%    |
| Patient 9  |                      |                            |                   | BM     | 43%    |
| Patient 10 | ChIP-seq             | ChIP-seq                   | N/A               | BM     | 86%    |
| Patient 11 | ChIP-seq             | ChIP-seq                   | N/A               | BM     | 94%    |

Pyro; Bisulfite-pyrosequencing, MCAM; Methylated CpG island Amplification followed by Microarray, PB; peripheral blood, BM; bone marrow

Supplemental Table 2. Primer sequences PCR conditions

| Gene         | Step | Annealing Temp. (°C) | Sequence 5' to 3'                                                                                        | 5'-modified |
|--------------|------|----------------------|----------------------------------------------------------------------------------------------------------|-------------|
| <i>OCT4</i>  | 1    | 53                   | GGGTTAGAGGTTAAGGTTAGTG<br>AAATCCCAAACCAAATATC                                                            |             |
|              | 2    | 54                   | GGGTTAGAGGTTAAGGTTAGTG<br>GGGACACCGCTGATCGTTTAAAAATCCCAAACCAAATATC<br>GGGACACCGCTGATCGTTTA               | Biotin      |
|              | S    |                      | GTAAGTTTTTATTTTATTAGG                                                                                    |             |
| <i>SOX2</i>  | 1    | 53                   | GGGAGGTTTAGTTTTTTTTATGTAAAATT<br>CCAAAATATCAAAAATAAATAAATTTCT                                            |             |
|              | 2    | 54                   | GGGAGGTTTAGTTTTTTTTATGTAAAATT<br>GGGACACCGCTGATCGTTTACCAAAAATCAAAAATAAATAAATTTCT<br>GGGACACCGCTGATCGTTTA | Biotin      |
|              | S    |                      | GGGTTAGAGTGAGGAGT                                                                                        |             |
| <i>MYC</i>   | 1    | 55                   | GTGGGGGAAAAGAAAAAGATT<br>CCTCTAAAAACCTACCTTCTC                                                           |             |
|              | 2    | 56                   | GTGGGGGAAAAGAAAAAGATT<br>GGGACACCGCTGATCGTTTACCTCTAAAAACCTACCTTCTC<br>GGGACACCGCTGATCGTTTA               | Biotin      |
|              | S    |                      | TTAGTTTATAGGTTTTTATAATG                                                                                  |             |
| <i>HOXB4</i> | 1    | 55                   | GTGGGGTTAGGGTGAGTAGATTTTT<br>TCCAAAACCTCCTACTACTATC                                                      |             |
|              | 2    | 56                   | GTGGGGTTAGGGTGAGTAGATTTTT<br>GGGACACCGCTGATCGTTTATCCAAAACCTCCTACTACTATC<br>GGGACACCGCTGATCGTTTA          | Biotin      |
|              | S    |                      | AGGGGAGGTTATTGGT                                                                                         |             |
| <i>KLF4</i>  | 1    | 52                   | GGGAGGTGTAGTTAGGTGAGATTG<br>CCCCCTCACACAACCTCA                                                           |             |
|              | 2    | 54                   | GGGAGGTGTAGTTAGGTGAGATTG<br>GGGACACCGCTGATCGTTTACCCCTCACACAACCTCA<br>GGGACACCGCTGATCGTTTA                | Biotin      |
|              | S    |                      | GAGGTGTAGTTAGGTGAGATT                                                                                    |             |
| <i>CDH13</i> | 1    | 60                   | TTTGGGAAGTTGGTTGGTTG<br>ACAACCCCTCTCCCTACCT                                                              |             |
|              | 2    | 56                   | AGTTTGGTTTTTAAGGAAAATATGTTTAGT<br>AACCAAATTCTCCACTACATTTATCC                                             | Biotin      |
|              | S    |                      | AGGAAAATATGTTTAGTGTA                                                                                     |             |
| <i>OLIG2</i> | 1    | 53                   | TTTTAAAGGTGAGGATGTTTATTAT<br>AAAAATCCAAACCCCTATAT<br>GGGACACCGCTGATCGTTTACTCCCTCCAAAAACCTCAA             |             |
|              | 2    | 56                   | TTTTAAAGGTGAGGATGTTTATTAT<br>GGGACACCGCTGATCGTTTA                                                        | Biotin      |
|              | S    |                      | AGGTGAGGATGTTTATTATA                                                                                     |             |
| <i>PGRB</i>  | 1    | 60                   | TGTGGGTGGTATTTTTAATGAGA<br>CCCCCTCACTAAAACCTAAA                                                          |             |
|              | 2    | 56                   | GAGAATTAGTTTTATTTGTTATTTGAGTGA<br>CAACCCATTCCAAAAAAAATC                                                  | Biotin      |
|              | S    |                      | GGGATTTGAGATTTT                                                                                          |             |

|               |   |    |                                                                                                     |        |
|---------------|---|----|-----------------------------------------------------------------------------------------------------|--------|
| <i>PGRA</i>   | 1 | 60 | GGAGGAGAAAAGGGGAGTTA<br>AAATCCTATCCCTAACAAAA<br>GGGACACCGCTGATCGTTAAATCCTATCCCTAACAAAA              |        |
|               | 2 | 56 | ATTGAGTTGAAGGTAAGGGTTT<br>GGGACACCGCTGATCGTTA                                                       | Biotin |
|               | S |    | GGATTTTATTGTTGTGT                                                                                   |        |
| <i>PMF1</i>   | 1 | 53 | TTTTTTTAGGAGTGGGGAGTT<br>CCATAATATATATATACCACATTA AAAACC                                            |        |
|               | 2 | 54 | TTTTTTTAGGAGTGGGGAGTT<br>GGGACACCGCTGATCGTTTACCATAATATATATATACCACATTA AAAACC<br>GGGACACCGCTGATCGTTA | Biotin |
|               | S |    | AGTGGGGAGTTGGTTA                                                                                    |        |
| <i>FANK1</i>  | 1 | 53 | GTTTTATTAGAGGGTAGGTTTAT<br>CCCACTAAAAACTACTCCT                                                      |        |
|               | 2 | 54 | GTTTTATTAGAGGGTAGGTTTAT<br>GGGACACCGCTGATCGTTTACCACTAAAAACTACTCCT<br>GGGACACCGCTGATCGTTA            | Biotin |
|               | S |    | GGGGTAGTTAGGGAGG                                                                                    |        |
| <i>KLHL34</i> | 1 | 58 | TGGGTTTTAAATTGAGTAGGTAGAAATG<br>AAACATCCCCAACACAACAC                                                |        |
|               | 2 | 60 | TGGGTTTTAAATTGAGTAGGTAGAAATG<br>GGGACACCGCTGATCGTTTAAACATCCCCAACACAACAC<br>GGGACACCGCTGATCGTTA      | Biotin |
|               | S |    | TTAGGGTTTTGTGGT                                                                                     |        |
| <i>ALPPL2</i> | 1 | 49 | GGAAAAGGTTTAGGTTATGTGTTAAG<br>TTAACACCCTAATCCCCCTCAA                                                |        |
|               | 2 | 50 | GGAAAAGGTTTAGGTTATGTGTTAAG<br>GGGACACCGCTGATCGTTTATAACACCCTAATCCCCCTCAA<br>GGGACACCGCTGATCGTTA      | Biotin |
|               | S |    | GGTTTAGGTTATGTGTTAAG                                                                                |        |
| <i>RLN3R1</i> | 1 | 58 | GAGGAAAAGGATAAAGGTATTTGAAAG<br>CCCCCATCACTAAAACACTAA                                                |        |
|               | 2 | 60 | GAGGAAAAGGATAAAGGTATTTGAAAG<br>GGGACACCGCTGATCGTTTACCCCCATCACTAAAACACTAA<br>GGGACACCGCTGATCGTTA     | Biotin |
|               | S |    | AAGGATAAAGGTATTTGAAAG                                                                               |        |
| <i>GMPPA</i>  | 1 | 58 | GGAGTAAGGAAGGTAAGGAGTTA<br>TACCACCACCTCAAATCCTC                                                     |        |
|               | 2 | 60 | GGAGTAAGGAAGGTAAGGAGTTA<br>GGGACACCGCTGATCGTTTATACCACCACCTCAAATCCTC<br>GGGACACCGCTGATCGTTA          | Biotin |
|               | S |    | AGTTAAGTGAAGGTTTTAAGTAT                                                                             |        |
| <i>ECE2</i>   | 1 | 58 | GGTGGAGGGGTGATAGAGAGAT<br>TACCACCACCTACCCAATA                                                       |        |
|               | 2 | 60 | GGTGGAGGGGTGATAGAGAGAT<br>GGGACACCGCTGATCGTTTATACCACCACCTACCCAATA<br>GGGACACCGCTGATCGTTA            | Biotin |
|               | S |    | AGGGAAGGGTTTTTTA                                                                                    |        |

Supplemental Table 3. Number of unique usable tags obtained from CHIP-sequencing

| Patient sample | Stem: CD34+CD38- |            |            | Progenitor: CD34+CD38+ |            |            |
|----------------|------------------|------------|------------|------------------------|------------|------------|
|                | H3               | H3K4me3    | H3K27me3   | H3                     | H3K4me3    | H3K27me3   |
| Patients 7-9   | 22,604,491       | 15,838,286 | 7,428,134  | 21,956,111             | 7,128,653  | 6,675,346  |
| Patient 10     | 7,733,952        | 13,582,925 | 16,134,237 | 13,198,472             | 14,289,082 | 15,454,622 |
| Patient 11     | 25,501,731       | 12,213,414 | 8,189,862  | 11,307,037             | 9,124,941  | 6,363,660  |
